# Supplementary material for: High Resolution Genome Wide Association Studies Reveal Rich Genetic Architectures of Grain Zinc and Iron in Common Wheat (Triticum aestivum L.)
Source: Frontiers journal article supplement (doi:10.3389/fpls.2022.840614), 2022-03-16
Supplement: Data_Sheet_1.pdf [file Data_Sheet_1.pdf]

## Supplementary Figures

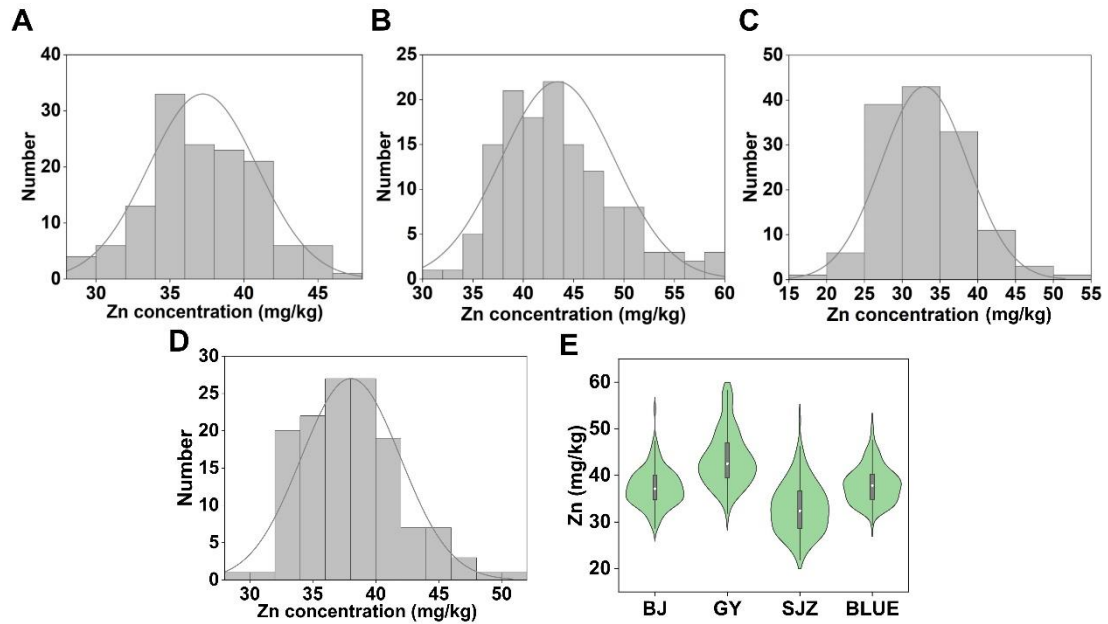

**Figure S1** Phenotypic variations of GZnC in 166 accessions under different environments, including (A) Beijing, 2019–2020; (B) Gaoyi, 2019–2020; (C) Shijiazhuang, 2019–2020; and (D) BLUE. The violin plot for GZnC in these four environments was shown in (E), allowing for comparison of the effect across locations.

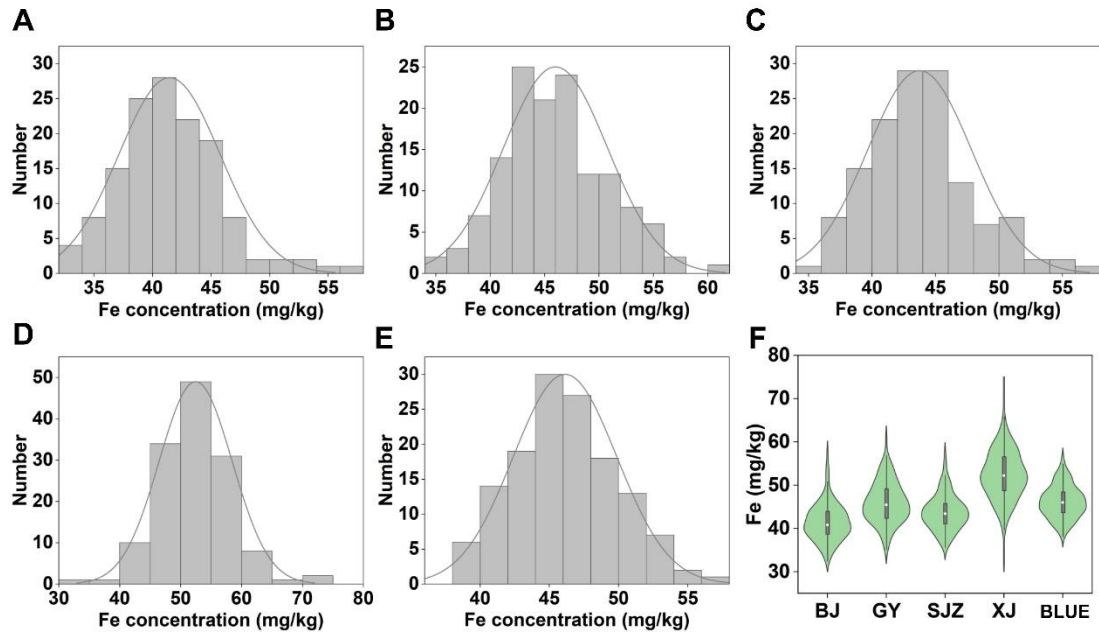

**Figure S2** Phenotypic variations of GFeC in 166 accessions under different environments, including (A) Beijing, 2019–2020; (B) Gaoyi, 2019–2020; (C) Shijiazhuang, 2019–2020; (D) Xinjiang location, 2019–2020; and (E) BLUE. The violin plot for GFeC in these five environments was shown in (F), allowing for comparison of the effect across locations.

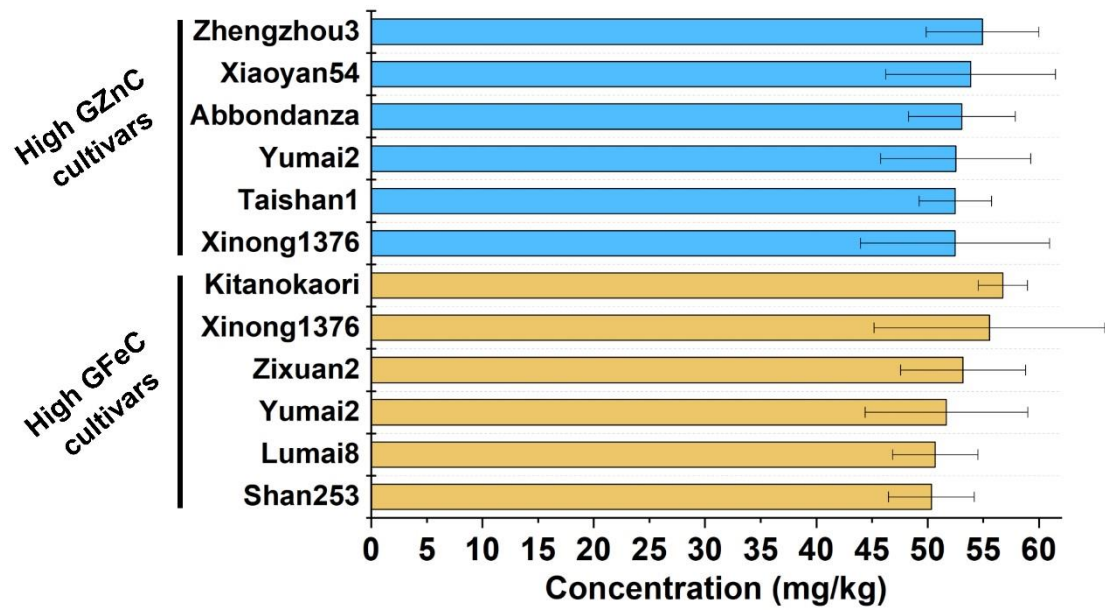

**Figure S3** Twelve cultivars with stable high GZnC or GFeC in different environments. BLUE values were showed with standard derivations across different environments.

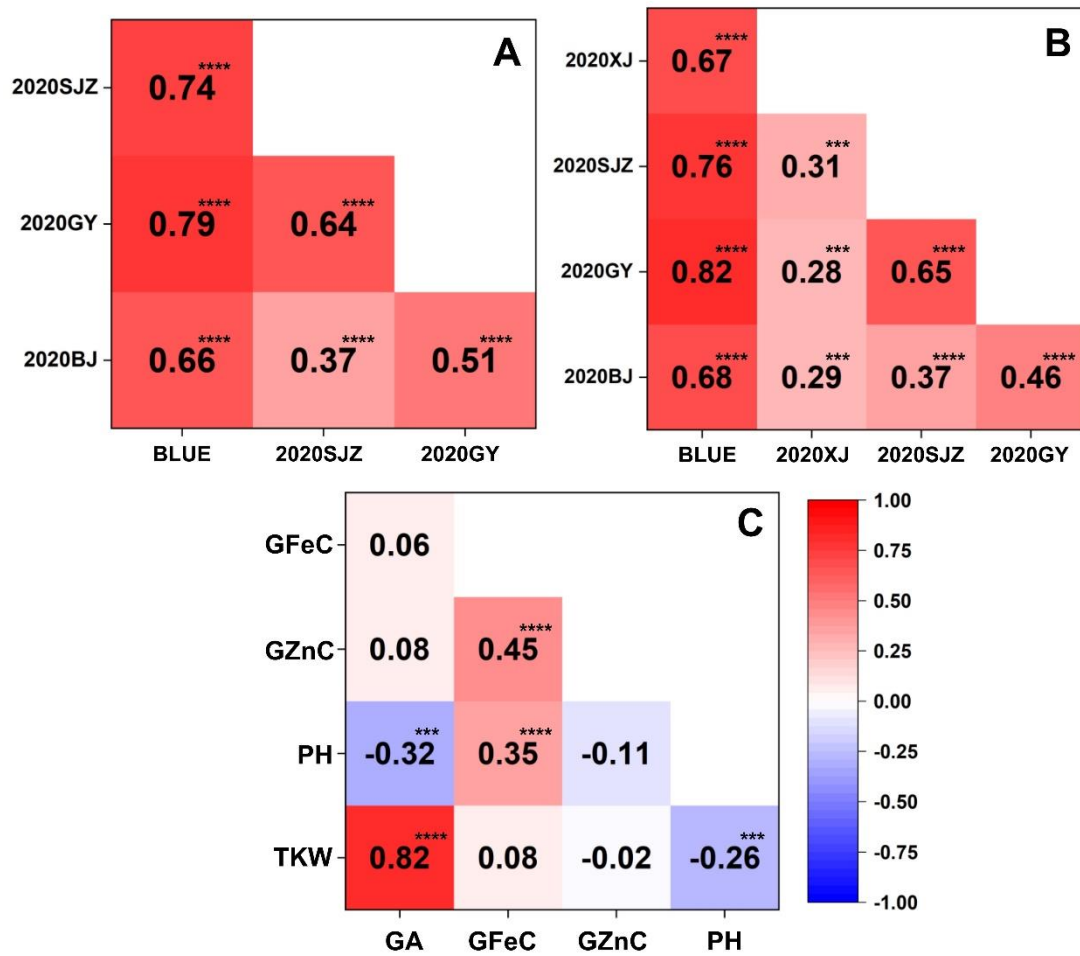

**Figure S4** Pearson's correlation analyses among different environments for GZnC (A), GFeC (B), and other agronomic traits based on BLUE values (C). 20BJ, 20GY, 20SJZ, 20XJ: Beijing, Gaoyi, Shijiazhuang, and Xinjiang in 2019–2020. BLUE: best linear unbiased estimations. GZnC: grain zinc concentration; GFeC: grain iron concentration; TKW: thousand kernel weight; PH: plant height; GA: grain area. \*  $P < 0.05$ ; \*\*  $P < 0.01$ ; \*\*\*  $P < 0.001$ ; \*\*\*\*  $P < 0.0001$

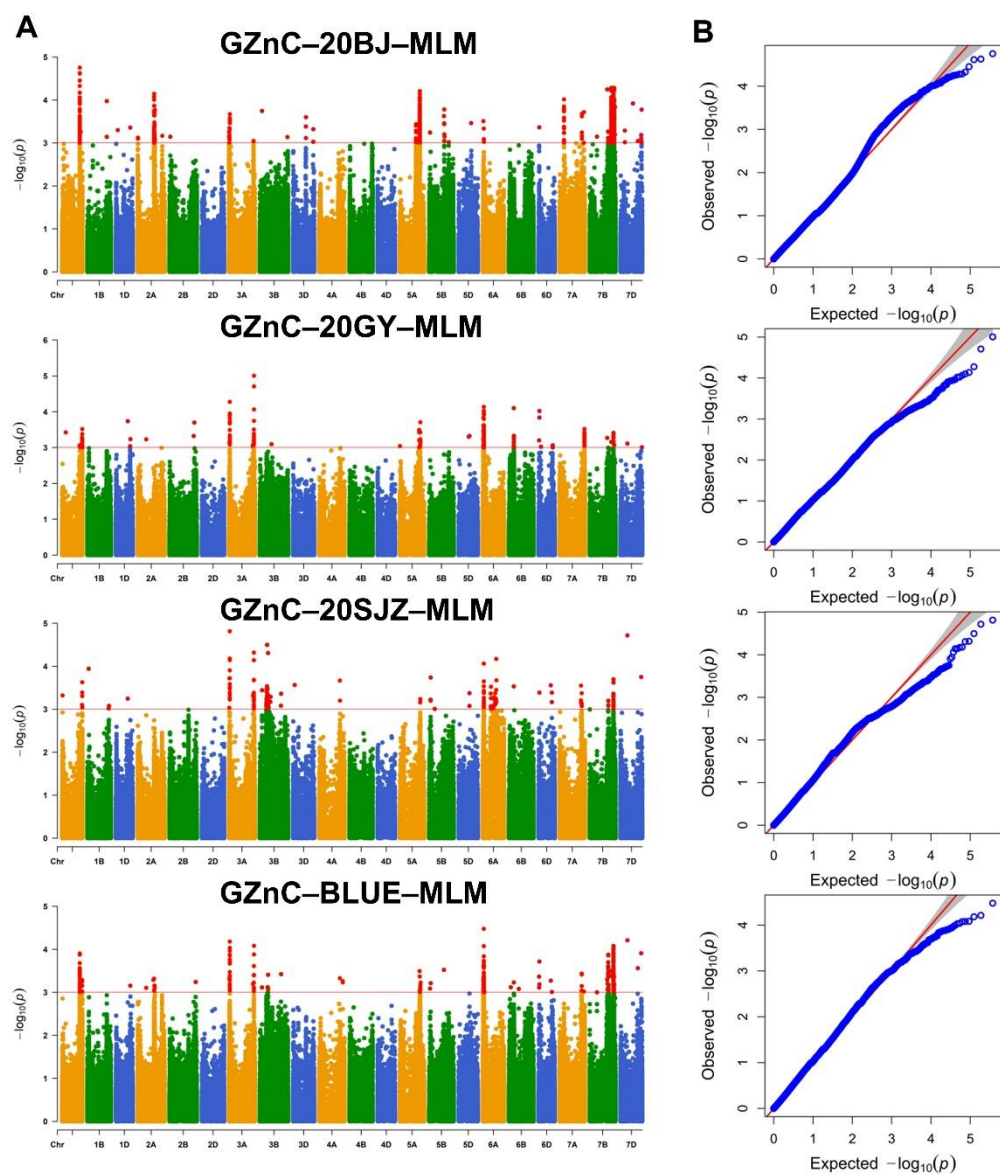

**Figure S5 Part1**

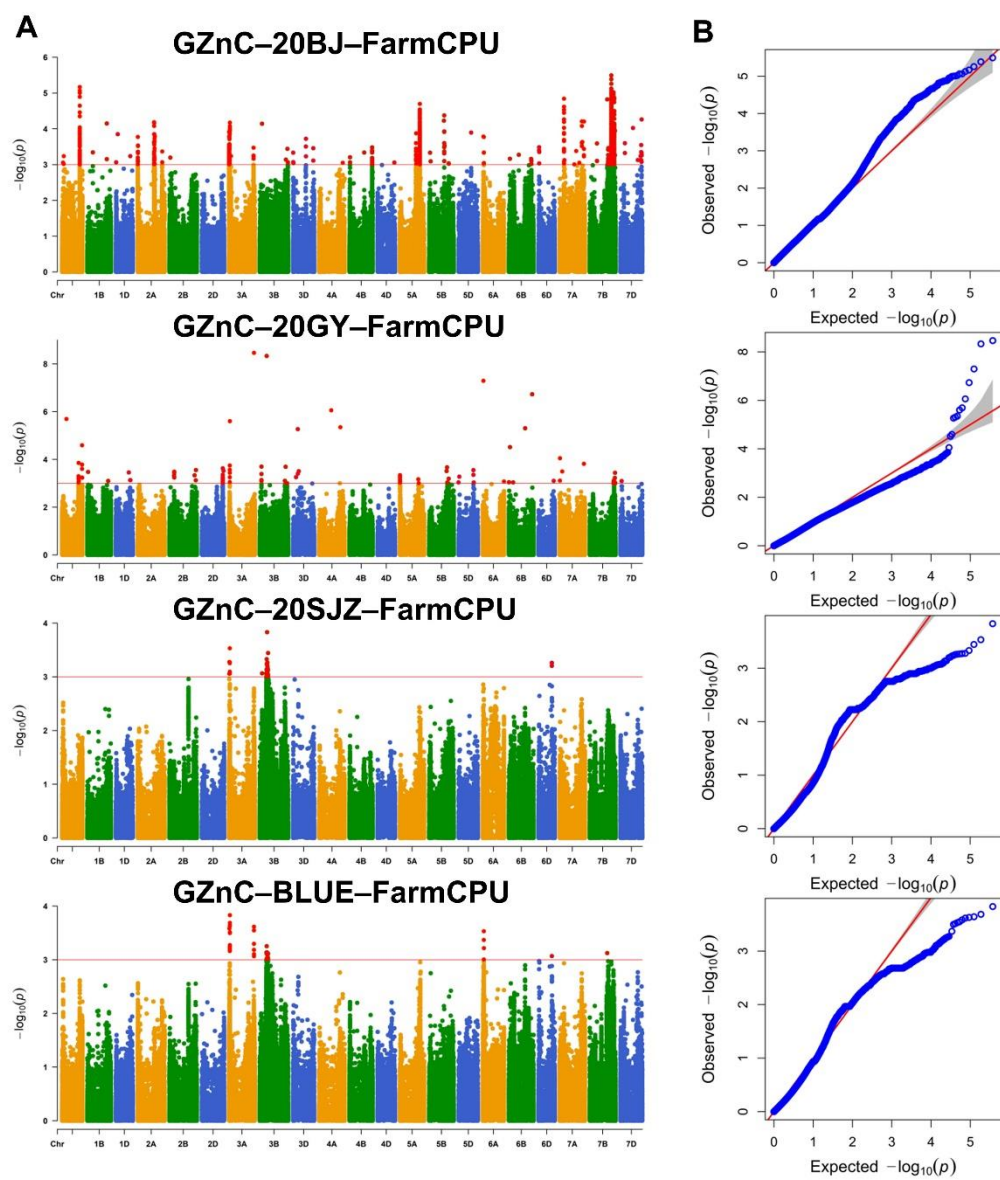

**Figure S5 Part2**

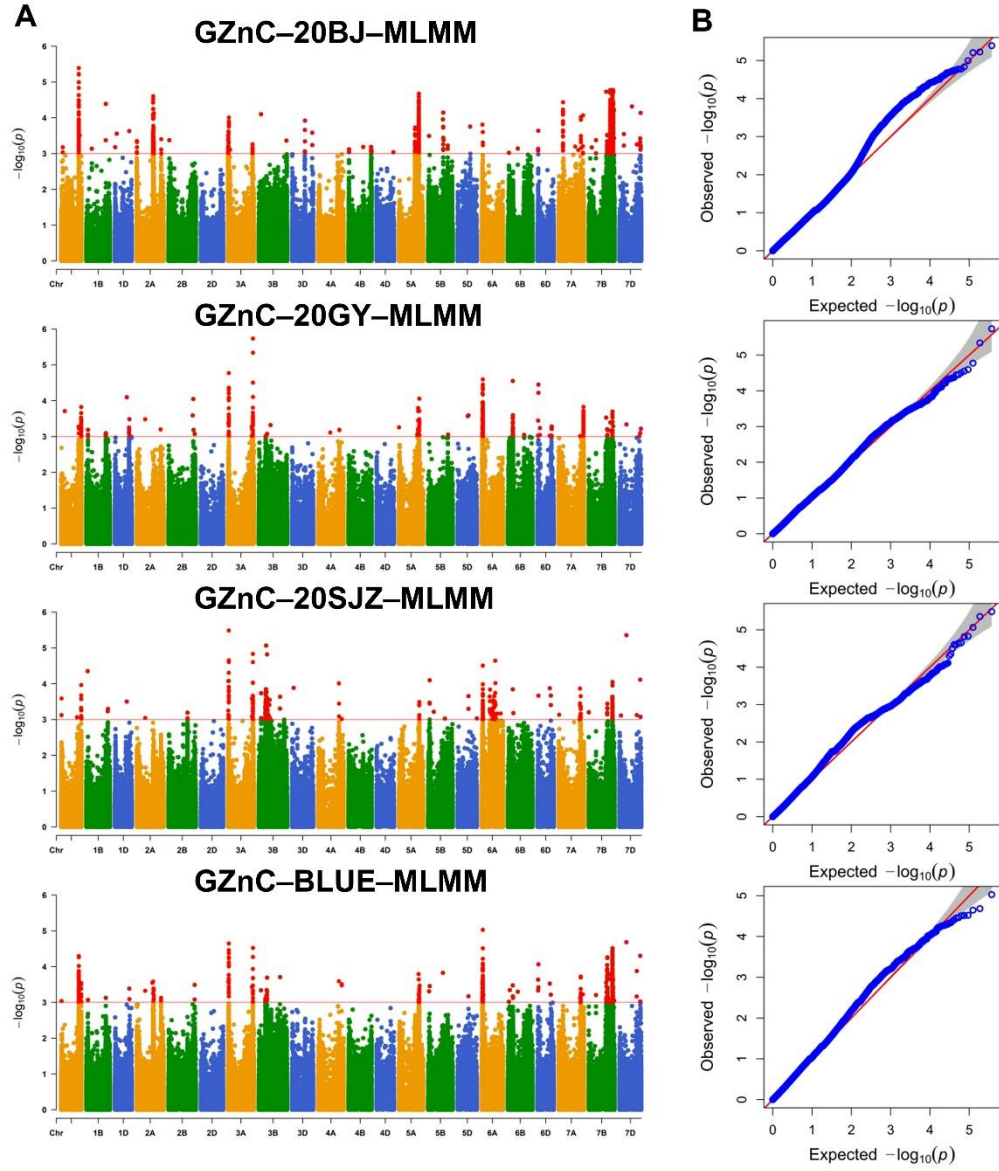

**Figure S5** (A) Manhattan and (B)  $Q-Q$  plots for GZnC analyzed by MLM (part1), FarmCPU (part2), and MLMM (part3) in different environments. The threshold of  $P = 1.0 \times 10^{-3}$  ( $-\log_{10}(P) = 3.0$ ) was used for calling significant marker-trait associations (MTAs). GZnC: grain zinc concentration. 20BJ, 20GY, 20SJZ: Beijing, Gaoyi, and Shijiazhuang in 2019–2020. BLUE: the best linear unbiased estimations across environments.



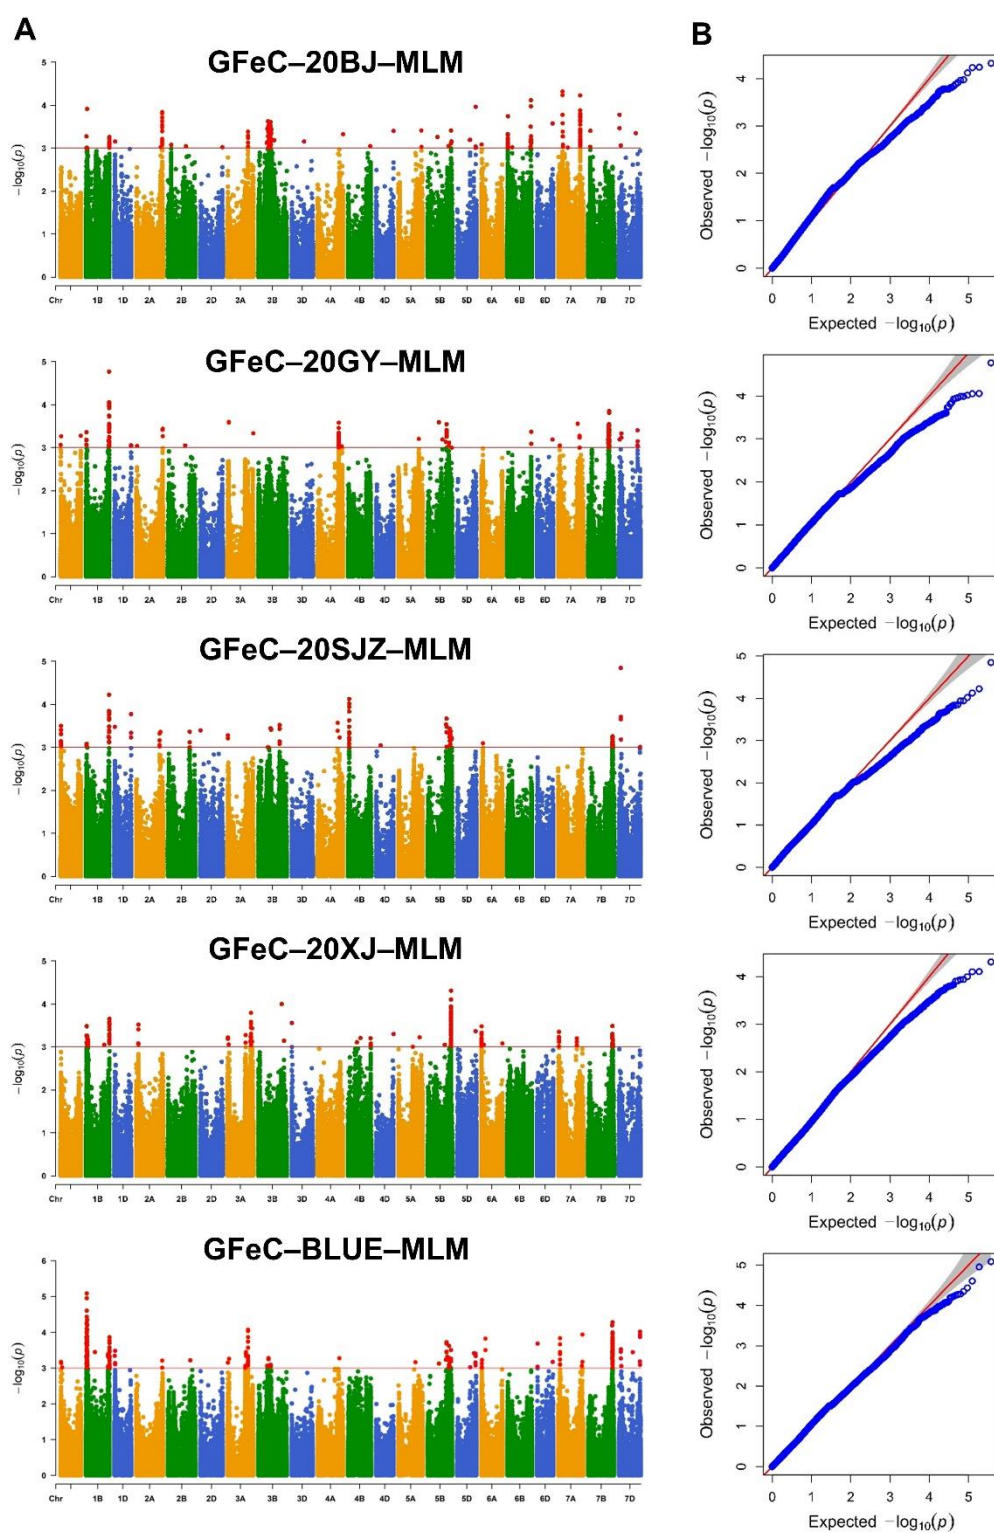

**Figure S6 Part1**



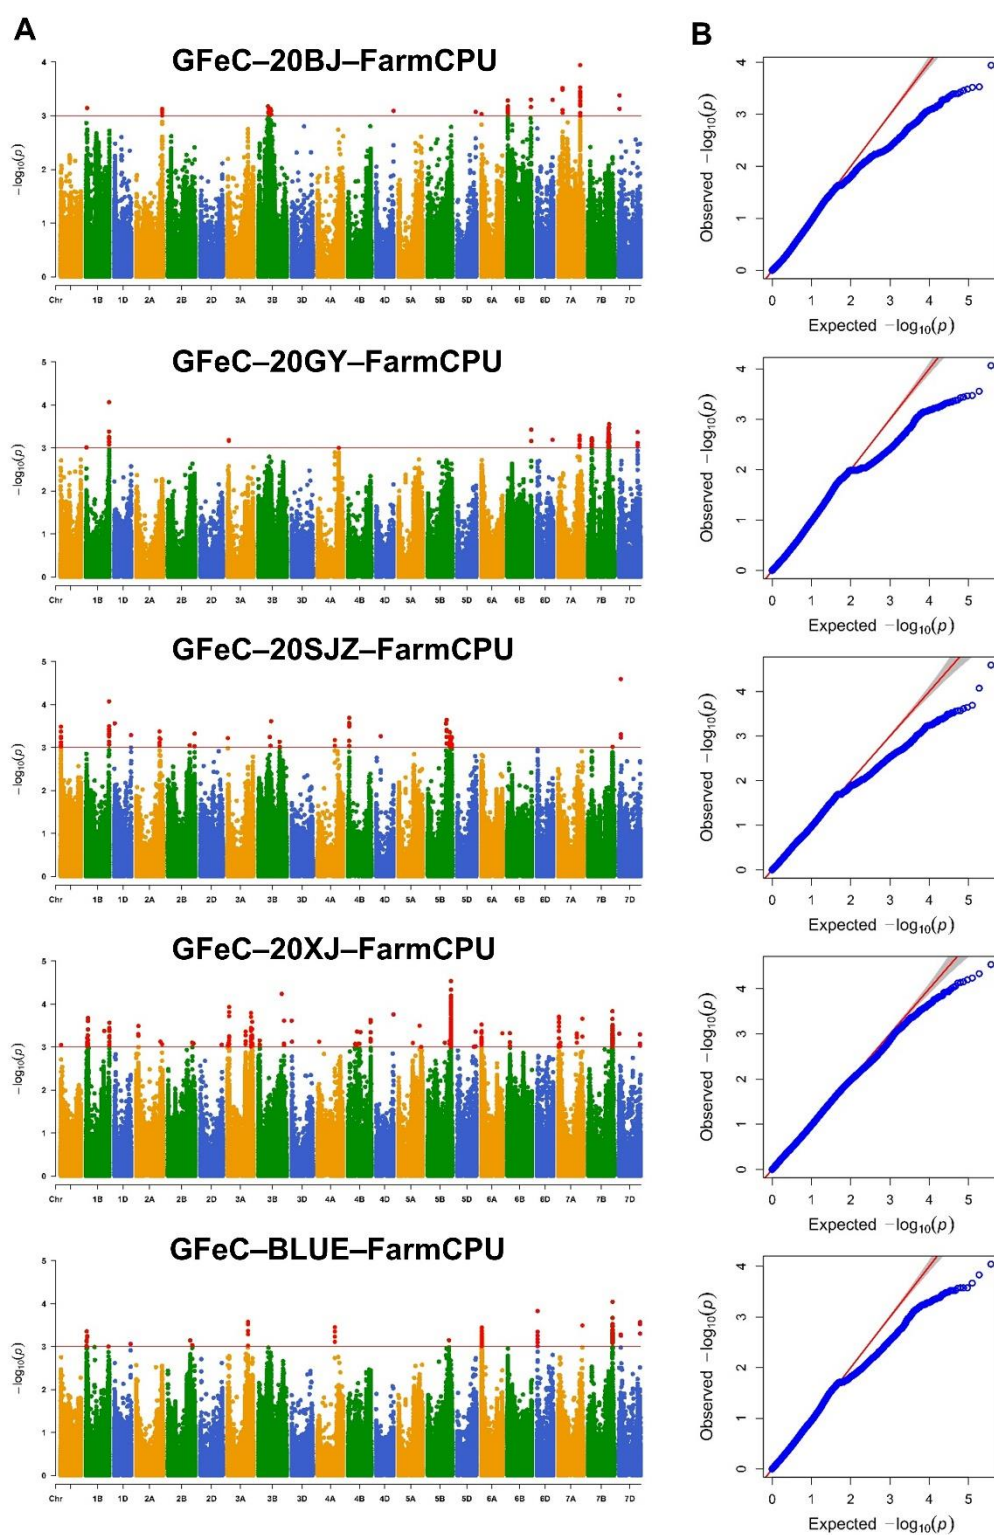

**Figure S6 Part2**

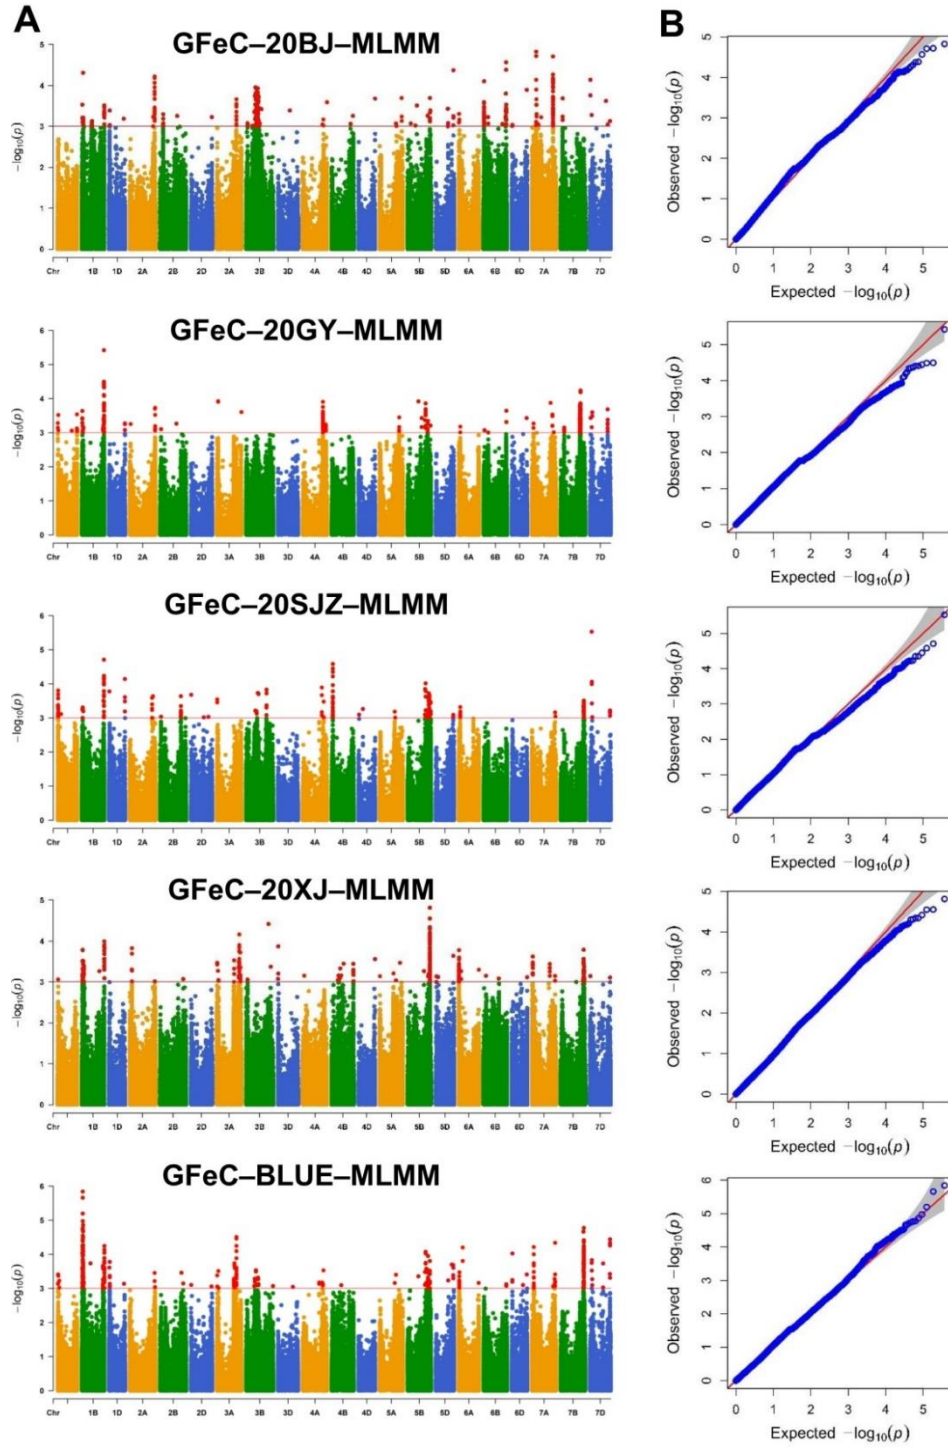

**Figure S6** (A) Manhattan and (B)  $Q-Q$  plots for GFeC analyzed by MLM (part1), FarmCPU (part2), and MLMM (part3) in different environments. The threshold of  $P = 1.0 \times 10^{-3}$  ( $-\log_{10}(P) = 3.0$ ) was used for calling significant marker-trait associations (MTAs). GFeC: grain iron concentration. 20BJ, 20GY, 20SJZ, 20XJ: Beijing, Gaoyi, Shijiazhuang, and Xinjiang, 2019–2020. BLUE: the best linear

unbiased estimations across environments.

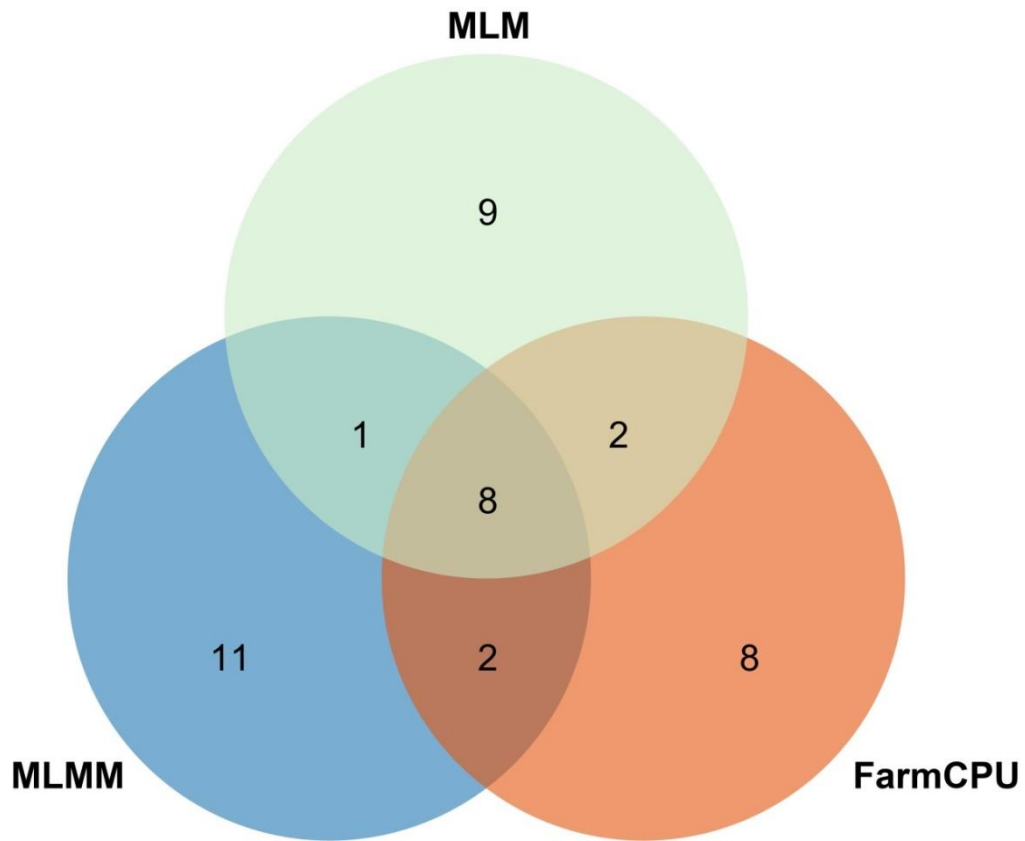

**Figure S7** Venn diagram showing the number of stable loci associated with grain zinc or iron concentrations detected with MLM, FarmCPU and MLMM.

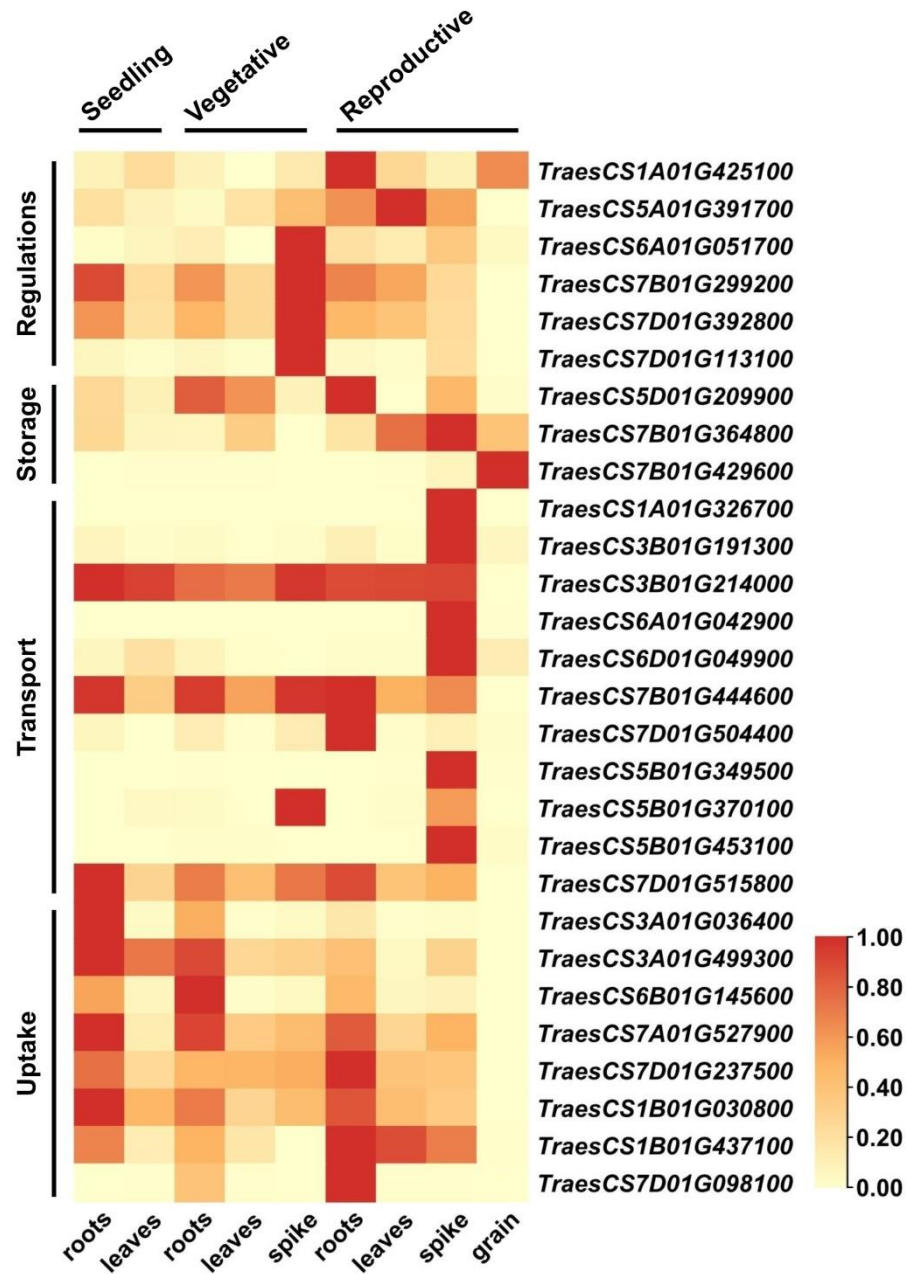

**Figure S8** Heatmap showing the expression profiles of the candidate genes involved in Zn/Fe uptake, transport, storage and regulations. Data were downloaded and normalized from expVIP database (<http://wheat-expression.com/>).
