# Supplementary material for: High Resolution Genome Wide Association Studies Reveal Rich Genetic Architectures of Grain Zinc and Iron in Common Wheat (Triticum aestivum L.)
Source: Front Plant Sci. 2022 Mar 16;13:840614. doi: 10.3389/fpls.2022.840614 (PMC8966881; doi:10.3389/fpls.2022.840614)
Supplement: Supplementary file 2 [file Data_Sheet_2.xlsx]

## Sheet: Table S1
Table S1 Information of 166 wheat accessions used in GWASa
ID	Cultivar	Origin	Released year	Population structure
HH001	Yumai47	Henan	1997	2
HH002	Bainong3217	Henan	1981	2
HH003	Shannong78-59	Shaanxi	2002	3
HH004	Zero-0	Turkey	n.a.	1
HH005	Jimai20	Shandong	2003	1
HH006	Sunong6	Anhui	n.a.	2
HH007	Zheng9023	Henan	2001	2
HH008	Huaimai18	Jiangsu	1999	1
HH009	Yumai50	Henan	1998	3
HH010	Yanzhan4110	Henan	2003	2
HH011	Xinong2000-7	Shaanxi	2006	2
HH012	Yumai34	Henan	1994	1
HH013	Xiaoyan22	Shaanxi	1998	3
HH014	Shixin828	Hebei	2013	2
HH015	Xinong291	Shaanxi	n.a.	1
HH016	Linhan2	Shanxi	n.a.	2
HH017	Neixiang188	Henan	2003	2
HH018	Wennong5	Shandong	2003	1
HH019	Gaoyou503	Hebei	1997	2
HH020	Shan253	Shaanxi	2001	2
HH021	Wanmai29	Anhui	1997	2
HH022	Wanmai19	Anhui	1994	2
HH023	Zhoumai26	Henan	2012	3
HH024	Huaimai20	Jiangsu	2003	1
HH025	Luyuan502	Shandong	2011	1
HH026	Zhoumai19	Henan	2004	2
HH027	Xinong979-005	Shaanxi	2005	2
HH028	Xinong1376	Shaanxi	1995	3
HH029	Huapei5	Henan	2006	3
HH030	Xinmai19	Henan	2006	2
HH031	Zhoumai23	Henan	2008	2
HH032	Lumai7	Shandong	1981	3
HH033	Xinmai9	Henan	1996	2
HH034	Norin67	Japan	1944	1
HH035	Zhongyu5	Henan	2001	3
HH036	Zhoumai12	Henan	1999	3
HH037	Zhoumai25	Henan	2010	3
HH038	Dorico	Italy	1993	1
HH039	Kitanokaori	Japan	2003	3
HH040	Yumai2	Henan	1983	3
HH041	Lumai8	Shandong	1985	1
HH042	Taishan5	Shandong	1983	1
HH043	Bainong64	Henan	2000	2
HH044	Zhoumai28	Henan	2013	3
HH045	Mantol	Italy	n.a.	1
HH046	85Zhong33	Henan	1990	3
HH047	Jimai21	Shandong	2004	1
HH048	Shi4185	Hebei	1999	3
HH049	Zhoumai18	Henan	2004	3
HH050	Heng7228	Hebei	2005	3
HH051	Luohan2	Henan	2001	2
HH052	Barra	Italy	n.a.	1
HH053	Zhoumai32	Henan	2014	3
HH054	Abbondanza	Italy	1950	1
HH055	Luomai21	Henan	2009	3
HH056	Shan354	Shaanxi	1998	3
HH057	Han6172	Hebei	2001	3
HH058	Aca801	Argentina	2002	1
HH059	Jinan13	Shandong	1980	1
HH060	Yumai21	Henan	1992	1
HH061	Libero	Italy	1993	1
HH062	Zixuan2	Shandong	1970	1
HH063	Xinong88	Shaanxi	1995	2
HH064	Huaimai21	Jiangsu	2006	3
HH065	Zhoumai30	Henan	2016	3
HH066	Sagittario	Italy	1994	1
HH067	Aifeng3	Shaanxi	1971	1
HH068	Yannong19	Shandong	2001	1
HH069	Yannong18	Shandong	1999	3
HH070	Yumai35	Henan	1995	3
HH071	Zhoumai22	Henan	2007	3
HH072	Linkang12	Shanxi	n.a.	3
HH073	Luami15	Shandong	1992	3
HH074	Hengguan33	Hebei	n.a.	3
HH075	ProINTAColibri	Argentina	1998	1
HH076	Xiaoyan81	Shaanxi	2005	2
HH077	Xinmai9408	Henan	2003	2
HH078	Shannong981	Shaanxi	n.a.	2
HH079	Jimai22	Shandong	2006	1
HH080	Lumai14	Shandong	1990	1
HH081	Zhoumai13	Henan	1999	3
HH082	Yumai49	Henan	2000	2
HH083	Aca601	Argentina	2002	1
HH084	An1331	Anhui	n.a.	2
HH085	Lumai11	Shandong	1988	1
HH086	Shan512	Shaanxi	2004	2
HH087	Kanto107	Japan	1995	1
HH088	Shanmai509	Shaanxi	n.a.	3
HH089	Lumai21	Shandong	1996	1
HH090	NideraBaguette20	Argentina	n.a.	1
HH091	Shanyou225	Shaanxi	1992	2
HH092	Jinmai61	Shanxi	1999	1
HH093	Zhou8425B	Henan	1988	3
HH094	Genio	Italy	1992	1
HH095	KleinJabali	Argentina	2003	1
HH096	Shijiazhuang8	Hebei	2001	3
HH097	Zhoumai11	Henan	1997	3
HH098	Su0663	Anhui	n.a.	2
HH099	Jishi02-1	Hebei	2004	2
HH100	Fu936	Anhui	1993	2
HH101	Zhengmai366	Henan	2005	2
HH102	Zimai12	Shandong	2001	1
HH103	Norin61	Japan	1944	1
HH104	Lumai9	Shandong	1980	1
HH105	Lumai23	Shandong	1996	1
HH106	Shijiazhuang15	Hebei	2005	3
HH107	Wanmai52	Anhui	2004	2
HH108	Yumai63	Henan	2003	2
HH109	Yumai18	Henan	1990	2
HH110	Jimai19	Shandong	2001	1
HH111	Liangxing66	Shandong	2008	1
HH112	Shan229	Shaanxi	1993	2
HH113	Taishan1	Shandong	1979	1
HH114	Wunong148	Shaanxi	2000	2
HH115	Jinan17	Shandong	1993	1
HH116	Fengchan3	Shaanxi	1966	2
HH117	HengGuan35	Hebei	2004	3
HH118	Wennong14	Shandong	2010	1
HH119	Linmai2	Shandong	2004	1
HH120	Aikang58	Henan	2005	3
HH121	Liangxing99	Shandong	2004	1
HH122	Wanmai38	Anhui	1997	1
HH123	Wanmai50	Anhui	2004	2
HH124	Lankao906	Henan	2001	3
HH125	Lampo	Italy	1994	1
HH126	Yumai57	Henan	1999	2
HH127	Jinhe9123	Hebei	2008	3
HH128	Lumai6	Shandong	1980	2
HH129	Xiaoyan54	Shaanxi	2000	2
HH130	Zhoumai31	Henan	2010	2
HH131	Zhoumai16	Henan	2002	3
HH132	Wanmai53	Anhui	2004	2
HH133	Xiaoyan6	Shaanxi	1981	2
HH134	Shixin733	Hebei	2001	2
HH135	Zhongmai875	Henan	2014	3
HH136	Gaocheng8901	Hebei	1998	1
HH137	Sunstate	Australia	1993	1
HH138	Zhong892	Henan	n.a.	3
HH139	Shiyou17	Hebei	2007	1
HH140	Shannong20	Shandong	2010	1
HH141	Zhongmai871	Henan	2012	3
HH142	Neixiang5	Henan	1955	3
HH143	Funo	Italy	1944	2
HH144	Zhengzhou3	Henan	1965	2
HH145	St1472/506	Henan	1965	2
HH146	Yumai7	Henan	1982	3
HH147	Yumai13	Henan	1991	1
HH148	Bima1	Shaanxi	1947	1
HH149	Bima4	Shaanxi	1947	1
HH150	Shan715	Shaanxi	2005	3
HH151	Linmai4	Shandong	2006	1
HH152	Zhongyu9	Henan	2004	3
HH153	PH82-2	Shandong	1991	2
HH154	Lankao24	Henan	n.a.	3
HH155	Wan23094	Anhui	2007	2
HH156	Jining16	Shandong	2004	1
HH157	Lumai5	Shandong	1984	1
HH158	Wanmai33	Anhui	1997	2
HH159	NideraBaguette10	Argentina	n.a.	1
HH160	Yannong15	Shandong	1976	1
HH161	KleinFlecha	Argentina	2003	1
HH162	Shanmai94	Shaanxi	2006	2
HH163	11CA40	Henan	2011	1
HH164	Lankao2	Henan	n.a.	3
HH165	Shan150	Shaanxi	2000	2
HH166	Zhongmai895	Henan	2012	3
a Data was from Fu et al. (2020)
Fu, L., Wu, J., Yang, S., Jin, Y., Liu, J., Yang, M., et al. (2020). Genome-wide association analysis of stem water-soluble carbohydrate content in bread wheat. Theor. Appl. Genet. 133, 2897–2914. doi:10.1007/s00122-020-03640-x.

## Sheet: Table S2
Table S2 Analysis of variance for GZnC and GFeC in 166 wheat accessionsa,b
Trait	Mean Square
	Genotype (G)	Environment (E)	G × E interaction	Replicate	Error
GZnC	83.11***	4896.16***	25.62*	393.41***	20.58
GFeC	62.45***	923.45***	18.13*	99.51***	16.22
a GZnC: grain zinc concentration; GFeC: grain iron concentration
b *P < 0.05; ***P < 0.001

## Sheet: Table S3
Table S3 Pleiotropic loci simultaneously associated with GZnC, GFeC, PH or TKW
Traita	Environmentb	Chrc	Physical Interval (Mb)d	Representative SNPe	Allelef,g	Frequency of favorable allelef	P value for PHh	Effect for PHh	P value for TKWi	Effect for TKWi
GZnC, GFeC	E1, E2, BLUE	7AL	706.91	AX_94741862	T/G	0.35	0.205	/	0.343	/
GFeC, PH	E1, E4, BLUE	5AL	495.92	AX_109311262	G/A	0.09	<0.001	4.91	0.331	/
GFeC, PH	E3, E4, BLUE	7BL	706.45	Tdurum_contig61856_900	A/C	0.36	0.001	3.23	0.035	/
GZnC, TKW	E1, E2, E3, BLUE	3AS	20.33	AX_111528452	T/G	0.31	0.377	/	0.001	3.08
a GZnC: grain zinc concentration; GFeC: grain iron concentration; TKW: thousand kernel weight; PH: plant height
b E1, E2, E3, E4: Beijing, Gaoyi, Shijiazhuang, and Xinjiang locations, respectively, 2019–2020; BLUE: best linear unbiased estimation; BLUE-value was also used to conduct GWAS and was regarded as one environment
c Chr: chromosome
d Physical positions of SNP markers were based on IWGSC RefSeq v.1.0 (http://www.wheatgenome.org/)
e The most significant SNP with the lowest P value across environments for the corresponding locus was regarded as a representative
f The information in corresponding columns are based on the representative SNP
g “_” indicates the favorable allele with the increasing effect of GZnC or GFeC
h PH: plant height. P values for association between the representative markers of GZnC/GFeC QTL and plant height, and effect values of representative markers of GZnC/GFeC QTL on plant height were calculated by GAPIT using the MLM model
i TKW: thousand kernel weight. P values for association between the representative markers of GZnC/GFeC QTL and thousand kernel weight, and effect values of representative markers of GZnC/GFeC QTL on plant height were calculated by GAPIT using the MLM model

## Sheet: Table S4
Table S4 The information of two KASP markers
Marker	Chromosome	Physical position (Mb)a	Primer name	Primer sequence (5'→3')
K_AX_109875082	3A	724.58	AX_109875082A	AAAATTTATATAGCCCTTCGAAGCT
			AX_109875082B	AAAATTTATATAGCCCTTCGAAGCA
			AX_109875082C	GACAATGATGCCGGACCCTA
K_AX_94741862	7A	706.91	AX_94741862A	TTAACCGACAACCACCCCC
			AX_94741862B	TTAACCGACAACCACCCCA
			AX_94741862C	ACCTTGCGCTGATCCCTC
a Physical positions of SNP markers were based on IWGSC RefSeq v.1.0 (http://www.wheatgenome.org/)

## Sheet: Table S5
Table S5 Variations for the candidate gene of 3AL QTL between CS, ZM175 and LX987ab
Gene ID	Chromosome	SNP Position	CS	ZM175	LX987	Position
TraesCS3A01G499300	3A	724490386	G	G	A	Up Stream
	3A	724490393	C	C	A	Up Stream
	3A	724490627	T	T	C	Up Stream
	3A	724490635	T	T	C	Up Stream
	3A	724490731	G	G	A	Up Stream
	3A	724491457	T	T	C	Exon_synonymous_variant
	3A	724491601	A	A	G	Intron
	3A	724491619	A	A	G	Intron
	3A	724492240	A	A	G	Intron
	3A	724492269	C	C	T	Intron
	3A	724492300	T	T	C	Intron
	3A	724492310	G	G	C	Intron
	3A	724492323	C	C	T	Intron
	3A	724492385	G	G	T	Intron
	3A	724492516	T	T	G	Exon_missense_variant
	3A	724493027	C	C	G	Exon_synonymous_variant
	3A	724493143	C	C	T	Exon_missense_variant
	3A	724493153	G	G	C	Exon_synonymous_variant
	3A	724493224	G	G	A	Exon_synonymous_variant
	3A	724493264	G	G	C	Exon_synonymous_variant
	3A	724493387	C	C	T	Exon_synonymous_variant
	3A	724493389	G	G	A	Exon_synonymous_variant
	3A	724493402	C	C	T	Exon_synonymous_variant
	3A	724493447	G	G	A	Exon_synonymous_variant
	3A	724493491	C	C	T	Exon_missense_variant
	3A	724493498	T	T	G	Exon_missense_variant
	3A	724495649	G	G	A	Intron
	3A	724496048	A	A	G	Intron
	3A	724496284	G	G	A	Intron
	3A	724496324	A	A	G	Intron
	3A	724497115	T	T	C	Down Stream
	3A	724497257	T	T	C	Down Stream
	3A	724497502	A	A	T	Down Stream
	3A	724497520	T	T	C	Down Stream
	3A	724497766	A	A	G	Down Stream
	3A	724497785	A	A	C	Down Stream
a Information was extracted from Wheat SnpHub Portal (http://wheat.cau.edu.cn/Wheat_SnpHub_Portal/)
b CS: Chinese Spring; ZM175: Zhongmai 175; LX987: Lunxuan 987
